# Supplementary material for: A Toll receptor–FoxO pathway represses Pavarotti/MKLP1 to promote microtubule dynamics in motoneurons
Source: PubMed Central journal article supplement — J Cell Biol. 2016 Aug 15;214(4):459–74. doi: 10.1083/jcb.201601014 (PMC4987293; doi:10.1083/jcb.201601014), 2016-08-15
Supplement: JCB_201601014_sm.pdf [file JCB_201601014_sm.pdf]

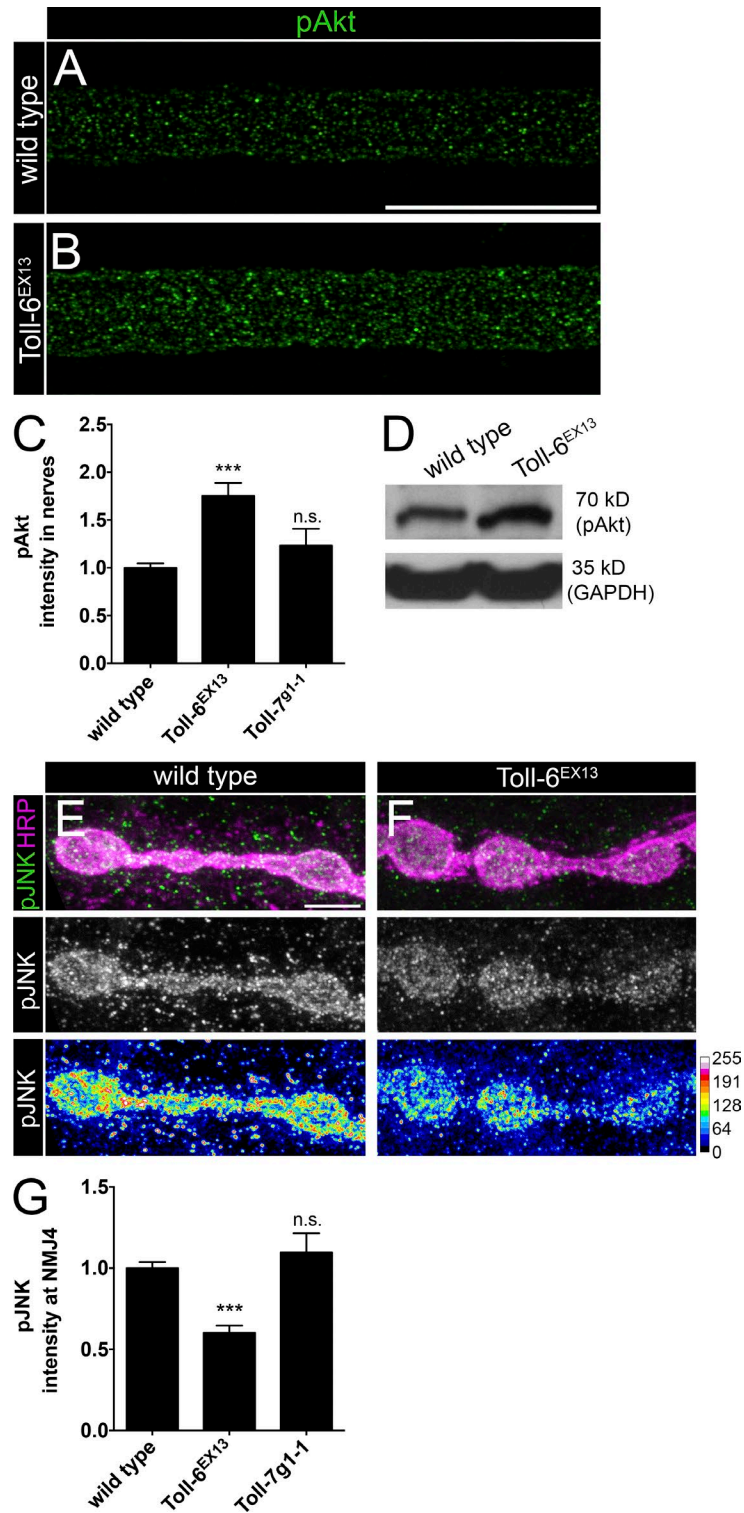

Figure S1. **Toll-6 regulates activity of known FoxO kinases.** (A and B) Representative confocal projections of L3 nerves of indicated genotypes labeled with anti-pAkt. Bar, 10  $\mu$ m. (C) Quantification of pAkt intensity in nerves normalized to wild type. Wild type:  $1.0 \pm 0.05$  arbitrary units ( $n = 15$  nerves); Toll-6<sup>EX13</sup>:  $1.8 \pm 0.1$  arbitrary units ( $n = 16$  nerves); and Toll-791-1:  $1.2 \pm 0.2$  arbitrary units ( $n = 11$  nerves). (D) Immunoblot of pAkt expression in the CNS of wild-type and Toll-6 mutants. (E and F) Representative confocal projections of L3 NMJ4 labeled with HRP and pJNK, and corresponding lookup tables applied to pJNK projections. Bar, 5  $\mu$ m. (G) Quantification of pJNK intensity at NMJ4 relative to wild type. Wild type (OregonR):  $1.0 \pm 0.04$  arbitrary units ( $n = 34$ ); Toll-6<sup>EX13</sup>:  $0.6 \pm 0.04$  arbitrary units ( $n = 22$ ); and Toll-791-1:  $1.1 \pm 0.1$  arbitrary units ( $n = 13$ ). Anterior is up. Error bars are mean  $\pm$  SEM. n.s., not significantly different. \*\*\*,  $P < 0.001$ .

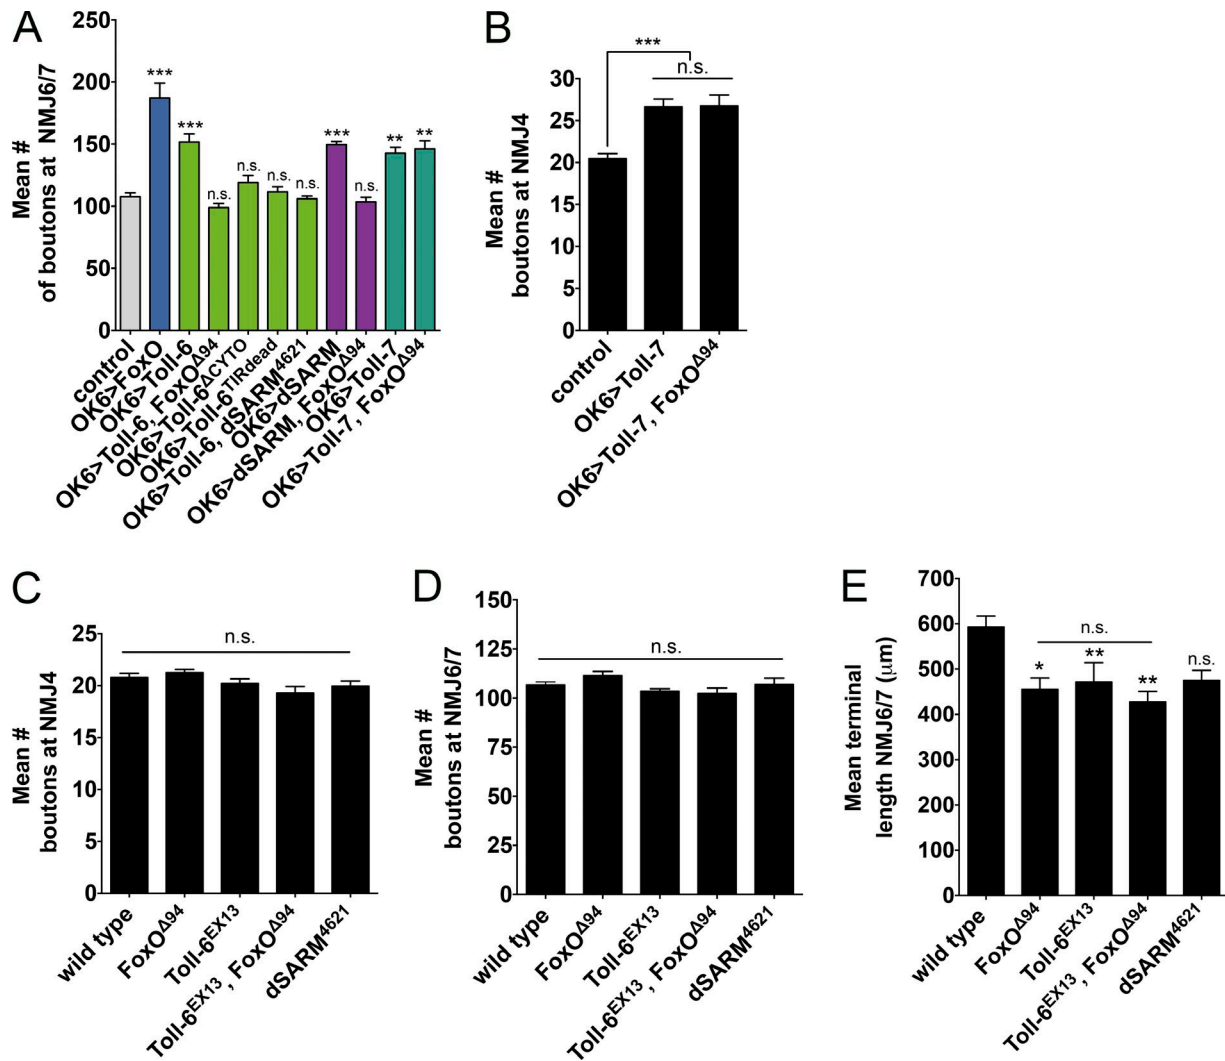

Figure S2. *Toll-6*, *dSARM*, and *foxO* overexpression and LOF NMJ phenotypes. (A) Quantification of bouton numbers at NMJ 6/7 (segment A2). Control: 107.5 ± 3.2 (*n* = 15); OK6>*foxO*: 187.1 ± 11.9 (*n* = 7); OK6>*Toll-6*: 151.6 ± 6.6 (*n* = 15); OK6>*Toll-6*, *foxO*<sup>Δ94</sup>: 98.9 ± 3.4 (*n* = 14); OK6>*Toll-6*<sup>CYTO</sup>: 119.1 ± 5.6 (*n* = 9); OK6>*Toll-6*<sup>IRdead</sup>: 111.6 ± 4.0 (*n* = 13); OK6>*Toll-6*, *dSARM*<sup>4621</sup>: 105.9 ± 2.3 (*n* = 17); OK6>*dSARM*: 149.5 ± 2.5 (*n* = 11); OK6>*dSARM*, *foxO*<sup>Δ94</sup>: 103.5 ± 3.6 (*n* = 13); OK6>*Toll-7*: 142.7 ± 4.9 (*n* = 15); and OK6>*Toll-7*, *foxO*<sup>Δ94</sup>: 146.2 ± 6.5 (*n* = 9). (B) Quantification of bouton numbers at NMJ4 in segments A2–A4. Control: 20.5 ± 0.6 (*n* = 15); OK6>*Toll-7*: 26.6 ± 0.9 (*n* = 19); and OK6>*Toll-7*, *foxO*<sup>Δ94</sup>: 26.8 ± 1.3 (*n* = 28). (C) Quantification of bouton numbers at NMJ4 in segments A2–A4. Wild type (OregonR): 20.8 ± 0.4 (*n* = 42); *foxO*<sup>Δ94</sup>: 21.3 ± 0.3 (*n* = 70); *Toll-6*<sup>EX13</sup>: 20.2 ± 0.4 (*n* = 27); *Toll-6*<sup>EX13</sup>, *foxO*<sup>Δ94</sup>: 19.3 ± 0.6 (*n* = 10); and *dSARM*<sup>4621</sup>: 20.0 ± 0.5 (*n* = 20). (D) Quantification of bouton numbers at NMJ 6/7 (segment A2). Wild type: 106.7 ± 1.6 (*n* = 23); *foxO*<sup>Δ94</sup>: 111.4 ± 2.1 (*n* = 25); *Toll-6*<sup>EX13</sup>: 103.5 ± 1.2 (*n* = 35); *Toll-6*<sup>EX13</sup>, *foxO*<sup>Δ94</sup>: 102.3 ± 2.8 (*n* = 16); and *dSARM*<sup>4621</sup>: 106.9 ± 3.2 (*n* = 19). (E) Quantification of terminal length of NMJ6/7 (segment A2). Wild type: 592.6 ± 24.4 μm (*n* = 18); *foxO*<sup>Δ94</sup>: 455.6 ± 24.6 μm (*n* = 15); *Toll-6*<sup>EX13</sup>: 471.7 ± 42.5 μm (*n* = 18); *Toll-6*<sup>EX13</sup>, *foxO*<sup>Δ94</sup>: 427.6 ± 23.2 μm (*n* = 16); and *dSARM*<sup>4621</sup>: 475.2 ± 22.2 μm (*n* = 16). Control is *OK6Gal4/+*. Error bars are mean ± SEM. n.s., not significantly different. \*, *P* < 0.05; \*\*, *P* < 0.01; \*\*\*, *P* < 0.001.

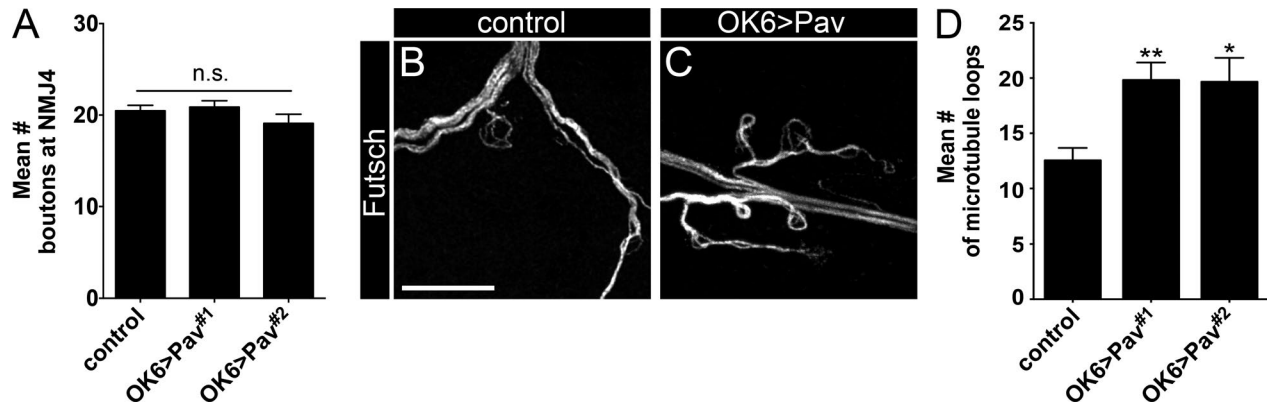

Figure S3. **Pav-KLP overexpression elevates MT stability at the NMJ.** (A) Quantification of bouton numbers at NMJ4 in segments A2–A4. Control:  $20.5 \pm 0.6$  ( $n = 15$ ); OK6>Pav#1:  $20.9 \pm 0.7$  ( $n = 8$ ); and OK6>Pav#2:  $19.1 \pm 1.0$  ( $n = 11$ ). (B and C) Representative confocal projections of Futsch-positive MT loops at NMJ6/7 of indicated genotypes. Bar, 10  $\mu\text{m}$ . (D) Quantification of Futsch-positive MT loops at NMJ6/7 of segment A2. Control (OK6Gal4/+):  $12.6 \pm 1.2$  ( $n = 9$ ); OK6>Pav#1:  $19.8 \pm 1.6$  ( $n = 6$ ); and OK6>Pav#2:  $19.7 \pm 2.2$  ( $n = 6$ ). Error bars are mean  $\pm$  SEM. n.s., not significantly different. \*,  $P < 0.05$ ; \*\*,  $P < 0.01$ .

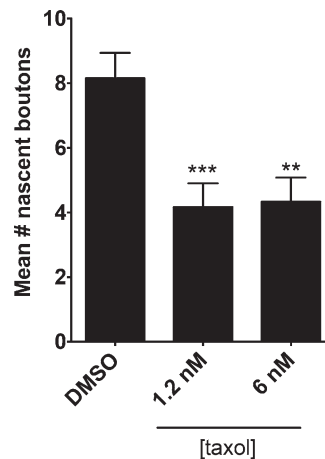

Figure S4. **Taxol-induced MT stability impairs nascent bouton formation.** Quantification of nascent boutons at wild-type NMJ6/7 segments A2 and A3 treated with taxol or 0.2% DMSO before high  $\text{K}^+$  stimulation. DMSO:  $8.2 \pm 0.8$  ( $n = 26$ ); 1.2 nM taxol:  $4.2 \pm 0.7$  ( $n = 18$ ); and 6 nM taxol:  $4.3 \pm 0.7$  ( $n = 15$ ). Wild type is OregonR. Error bars are mean  $\pm$  SEM. n.s., not significantly different from DMSO treatment. \*\*,  $P < 0.01$ ; \*\*\*,  $P < 0.001$ .

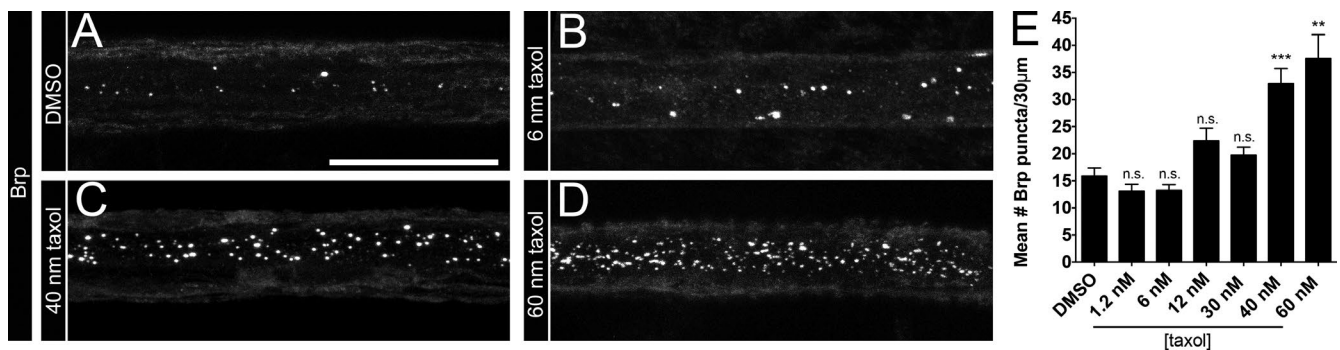

Figure S5. **Taxol-induced MT stability impairs axonal transport.** (A–D) Representative confocal projections of wild-type nerves labeled with Brp and treated with indicated concentrations of taxol or DMSO. Bar, 20  $\mu\text{m}$ . (E) Quantification of Brp accumulations per 30  $\mu\text{m}$  of nerve. 0.2% DMSO:  $15.9 \pm 1.5$  ( $n = 16$ ); 1.2 nM taxol:  $13.1 \pm 1.3$  ( $n = 46$ ); 6 nM taxol:  $13.3 \pm 1.1$  ( $n = 44$ ); 12 nM taxol:  $22.4 \pm 2.4$  ( $n = 47$ ); 30 nM taxol:  $19.8 \pm 1.5$  ( $n = 42$ ); 40 nM taxol:  $32.9 \pm 2.8$  ( $n = 27$ ); and 60 nM taxol:  $37.6 \pm 4.4$  ( $n = 16$ ). Wild type is OregonR. Error bars are mean  $\pm$  SEM. n.s., not significantly different. \*\*,  $P < 0.01$ ; \*\*\*,  $P < 0.001$ .

Table S1. RNAi and LOF phenotypes of canonical Toll pathway members

| Genotype                             | Mean bouton number $\pm$ SEM  |    |                             |    | Mean number of Futsch loops $\pm$ SEM |    |                            |    |
|--------------------------------------|-------------------------------|----|-----------------------------|----|---------------------------------------|----|----------------------------|----|
|                                      | NMJ6/7 A2                     | n  | NMJ4                        | n  | NMJ6/7 A2                             | n  | NMJ4                       | n  |
| Wild type                            | 106.7 $\pm$ 1.6               | 23 | 20.8 $\pm$ 0.4              | 42 | 12.6 $\pm$ 0.5                        | 22 | 4.2 $\pm$ 0.2              | 51 |
| MyD88 <sup>CO3881</sup>              | 103 $\pm$ 2.9 <sup>a</sup>    | 10 | 21.5 $\pm$ 0.9 <sup>a</sup> | 13 | 11.5 $\pm$ 1.0 <sup>a</sup>           | 6  | 3.3 $\pm$ 0.4 <sup>a</sup> | 15 |
| Rel <sup>E20</sup>                   | 111.3 $\pm$ 6.4 <sup>a</sup>  | 8  | 19.4 $\pm$ 1.0 <sup>a</sup> | 14 | 12.6 $\pm$ 0.9 <sup>a</sup>           | 8  | 2.9 $\pm$ 0.3 <sup>a</sup> | 15 |
| Control                              | 106.8 $\pm$ 5.2               | 12 | 21.1 $\pm$ 0.5              | 29 | 11.9 $\pm$ 0.9                        | 11 | 3.6 $\pm$ 0.5              | 18 |
| D42>dcr-2; FoxO RNAi                 | 105.3 $\pm$ 1.7 <sup>a</sup>  | 8  | 20.9 $\pm$ 0.6 <sup>a</sup> | 25 | 17.8 $\pm$ 1.3 <sup>b</sup>           | 12 | 7.1 $\pm$ 0.6 <sup>c</sup> | 19 |
| D42>dcr-2; Toll-6 RNAi <sup>#1</sup> | 103.0 $\pm$ 3.7 <sup>a</sup>  | 6  | 20.7 $\pm$ 1.9 <sup>a</sup> | 10 | 21.2 $\pm$ 2.6 <sup>d</sup>           | 6  | 5.7 $\pm$ 0.5 <sup>a</sup> | 10 |
| D42>dcr-2; Toll-6 RNAi <sup>#2</sup> | 107.5 $\pm$ 4 <sup>a</sup>    | 10 | 19.9 $\pm$ 0.7 <sup>a</sup> | 14 | 17.8 $\pm$ 0.9 <sup>d</sup>           | 18 | 6.8 $\pm$ 0.5 <sup>d</sup> | 11 |
| D42>dcr-2; dSARM RNAi <sup>#1</sup>  | 98.9 $\pm$ 5.4 <sup>a</sup>   | 11 | 19.9 $\pm$ 0.5 <sup>a</sup> | 31 | 18.6 $\pm$ 1.0 <sup>d</sup>           | 11 | 6.1 $\pm$ 0.5 <sup>b</sup> | 12 |
| D42>dcr-2; dSARM RNAi <sup>#2</sup>  | 104.3 $\pm$ 4 <sup>a</sup>    | 12 | 20.2 $\pm$ 0.7 <sup>a</sup> | 35 | 19.2 $\pm$ 1.8 <sup>d</sup>           | 10 | 5.3 $\pm$ 0.4 <sup>a</sup> | 18 |
| D42>dcr-2; dSARM RNAi <sup>#3</sup>  | 111.3 $\pm$ 2.8 <sup>a</sup>  | 13 | 21.0 $\pm$ 0.7 <sup>a</sup> | 31 | 18.8 $\pm$ 1.1 <sup>c</sup>           | 22 | 7.7 $\pm$ 0.6 <sup>c</sup> | 18 |
| D42>dcr-2; dSARM RNAi <sup>#4</sup>  | 105.3 $\pm$ 3.3 <sup>a</sup>  | 13 | 20.6 $\pm$ 0.7 <sup>a</sup> | 19 | 16.8 $\pm$ 1.3 <sup>a</sup>           | 13 | 5.4 $\pm$ 0.4 <sup>a</sup> | 19 |
| D42>dcr-2; dSARM RNAi <sup>#5</sup>  | 82.9 $\pm$ 3.6 <sup>a</sup>   | 10 | 21.0 $\pm$ 0.6 <sup>a</sup> | 7  | 11.5 $\pm$ 1.2 <sup>a</sup>           | 10 | 4.9 $\pm$ 0.5 <sup>a</sup> | 7  |
| D42>dcr-2; cact RNAi <sup>#1</sup>   | 82.6 $\pm$ 6.4 <sup>a</sup>   | 8  | 19.3 $\pm$ 1.2 <sup>a</sup> | 8  | 12.9 $\pm$ 2.0 <sup>a</sup>           | 8  | 3.0 $\pm$ 0.6 <sup>a</sup> | 8  |
| D42>dcr-2; cact RNAi <sup>#2</sup>   | 90.6 $\pm$ 7.3 <sup>a</sup>   | 10 | 19.8 $\pm$ 0.7 <sup>a</sup> | 12 | 9.4 $\pm$ 0.8 <sup>a</sup>            | 10 | 2.6 $\pm$ 0.4 <sup>a</sup> | 12 |
| D42>dcr-2; cact RNAi <sup>#3</sup>   | 107.8 $\pm$ 6.5 <sup>a</sup>  | 9  | 22.9 $\pm$ 1.1 <sup>a</sup> | 11 | 9.3 $\pm$ 0.7 <sup>a</sup>            | 9  | 3.0 $\pm$ 0.3 <sup>a</sup> | 11 |
| D42>dcr-2; dl RNAi <sup>#1</sup>     | 100.9 $\pm$ 5.6 <sup>a</sup>  | 9  | 20.9 $\pm$ 0.5 <sup>a</sup> | 14 | 13.4 $\pm$ 1.6 <sup>a</sup>           | 9  | 4.4 $\pm$ 0.5 <sup>a</sup> | 14 |
| D42>dcr-2; dl RNAi <sup>#2</sup>     | 111.9 $\pm$ 6.2 <sup>a</sup>  | 15 | 22.3 $\pm$ 1.3 <sup>a</sup> | 14 | 14.4 $\pm$ 1.2 <sup>a</sup>           | 13 | 3.1 $\pm$ 0.5 <sup>a</sup> | 14 |
| D42>dcr-2; dl RNAi <sup>#3</sup>     | 109.5 $\pm$ 11.6 <sup>a</sup> | 8  | 20.1 $\pm$ 0.7 <sup>a</sup> | 9  | 13.4 $\pm$ 1.9 <sup>a</sup>           | 7  | 3.1 $\pm$ 0.5 <sup>a</sup> | 9  |
| D42>dcr-2; dl RNAi <sup>#4</sup>     | 100.3 $\pm$ 5.3 <sup>a</sup>  | 15 | 18.7 $\pm$ 0.8 <sup>a</sup> | 17 | 10.2 $\pm$ 0.9 <sup>a</sup>           | 13 | 3.1 $\pm$ 0.4 <sup>a</sup> | 17 |
| D42>dcr-2; Myd88 RNAi                | 167.1 $\pm$ 8.4 <sup>b</sup>  | 10 | 22.4 $\pm$ 1.1 <sup>a</sup> | 16 | 14.5 $\pm$ 1.6 <sup>a</sup>           | 10 | 3.6 $\pm$ 0.5 <sup>a</sup> | 16 |
| D42>dcr-2; Pli RNAi                  | 104.6 $\pm$ 6.3 <sup>a</sup>  | 5  | 17.2 $\pm$ 1 <sup>b</sup>   | 14 | 14.5 $\pm$ 1.7 <sup>a</sup>           | 10 | 2.8 $\pm$ 0.4 <sup>a</sup> | 14 |
| D42>dcr-2; wek RNAi                  | 140 $\pm$ 5.5 <sup>a</sup>    | 6  | 19.9 $\pm$ 0.8 <sup>a</sup> | 27 | 16 $\pm$ 1.8 <sup>a</sup>             | 6  | 3.1 $\pm$ 0.3 <sup>a</sup> | 27 |

Quantification of the number of boutons at NMJ4 in A2–A4 and NMJ6/7 in A2 and Futsch-positive loops at NMJ6/7 in A2 of indicated genotypes. Wild type is OregonR; control is D42>dcr-2.

<sup>a</sup>Not significantly different.

<sup>b</sup>P < 0.05.

<sup>c</sup>P < 0.001.

<sup>d</sup>P < 0.01.

Table S2. RNAi phenotypes of mRNAs up-regulated in Toll-6 LOF mutants

| Genotype                             | Mean bouton numbers $\pm$ SEM |    |                             |    |
|--------------------------------------|-------------------------------|----|-----------------------------|----|
|                                      | NMJ6/7 A2                     | n  | NMJ4                        | n  |
| Control                              | 108.3 $\pm$ 6.2               | 10 | 19.3 $\pm$ 0.9              | 15 |
| D42>dcr-2; Klp61F RNAi               | 113.6 $\pm$ 2.6 <sup>a</sup>  | 7  | 21.6 $\pm$ 0.7 <sup>a</sup> | 11 |
| D42>dcr-2; Klp67A RNAi <sup>#1</sup> | 96.8 $\pm$ 5.0 <sup>a</sup>   | 8  | 16.9 $\pm$ 0.9 <sup>a</sup> | 12 |
| D42>dcr-2; Klp67A RNAi <sup>#2</sup> | 106.6 $\pm$ 7.5 <sup>a</sup>  | 5  | 18.3 $\pm$ 1.0 <sup>a</sup> | 10 |
| D42>dcr-2; Klp3A RNAi <sup>#1</sup>  | 121.8 $\pm$ 6.6 <sup>a</sup>  | 10 | 22 $\pm$ 0.7 <sup>a</sup>   | 20 |
| D42>dcr-2; Klp3A RNAi <sup>#2</sup>  | 104.8 $\pm$ 4.6 <sup>a</sup>  | 12 | 19.9 $\pm$ 0.9 <sup>a</sup> | 16 |
| D42>dcr-2; Pav RNAi <sup>#1</sup>    | 152.5 $\pm$ 5.6 <sup>b</sup>  | 13 | 28.5 $\pm$ 0.9 <sup>c</sup> | 30 |
| D42>dcr-2; Pav RNAi <sup>#2</sup>    | 159.2 $\pm$ 8.2 <sup>b</sup>  | 12 | 28.6 $\pm$ 1.1 <sup>c</sup> | 21 |
| D42>dcr-2; Pav RNAi <sup>#3</sup>    | 143.3 $\pm$ 7.4 <sup>d</sup>  | 9  | 27.9 $\pm$ 1.3 <sup>c</sup> | 25 |

Quantification of the number of boutons at NMJ4 in A2–A4 and NMJ6/7 in A2 of indicated genotypes. Control is D42>dcr-2.

<sup>a</sup>Not significantly different.

<sup>b</sup>P < 0.01.

<sup>c</sup>P < 0.001.

<sup>d</sup>P < 0.05.
